# Supplementary material
Source: PubMed Central journal article supplement (PMC3974614)
Supplement: la4041985_si_001.pdf [file la4041985_si_001.pdf]

Mapping Glycosaminoglycan-Hydroxyapatite Colloidal Gels as Potential Tissue Defect Fillers

*S. Connor Dennis*<sup>1, 2, ‡</sup>, *Michael S. Detamore*<sup>1, 2, ‡</sup>, *Sarah L. Kieweg*<sup>1, 3, ‡</sup>, *Cory J. Berkland*<sup>1, 2, 4\*, ‡</sup>

<sup>1</sup>Bioengineering Program, <sup>2</sup>Chemical and Petroleum Engineering Department, <sup>3</sup>Mechanical Engineering Department, <sup>4</sup>Pharmaceutical Chemistry Department

University of Kansas, Lawrence, KS 66047

KEYWORDS: Hydroxyapatite; Glycosaminoglycan; Chondroitin Sulfate; Hyaluronic Acid; Colloidal Gel; Self-Assembling Fluid; Herschel-Bulkley Fluid; Tissue Defect Filler

\*Corresponding author

‡These authors contributed equally

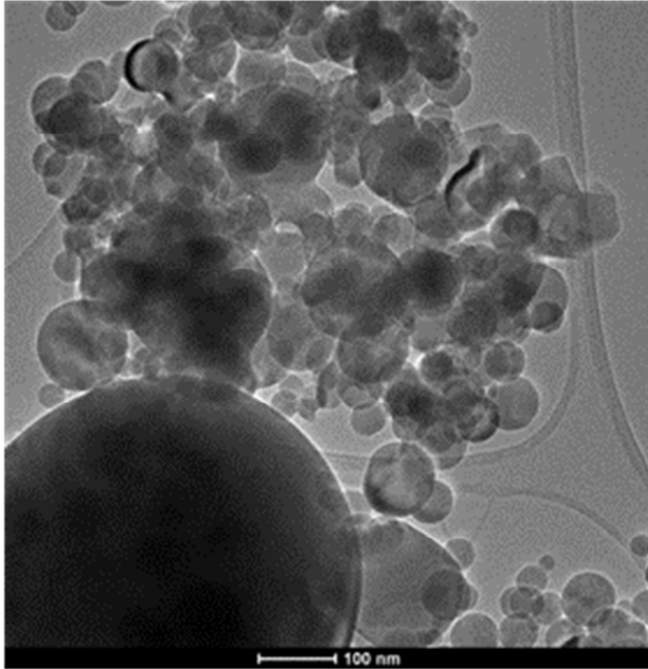

Supporting Figure 1: TEM image of HAP particles (scale bar = 100 nm).

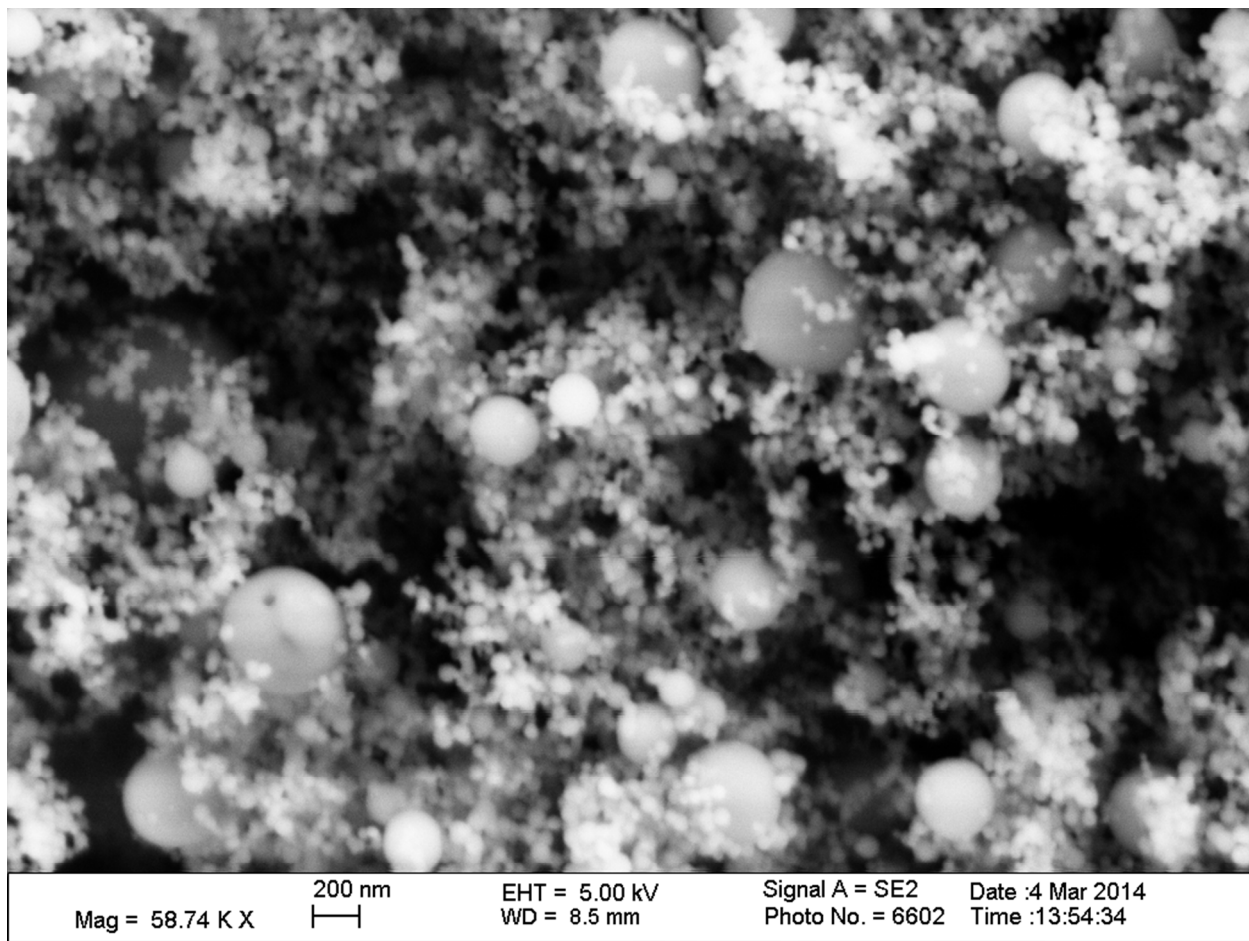

Supporting Figure 2: SEM image of HAP particles (60% w/v) (scale bar = 200 nm)

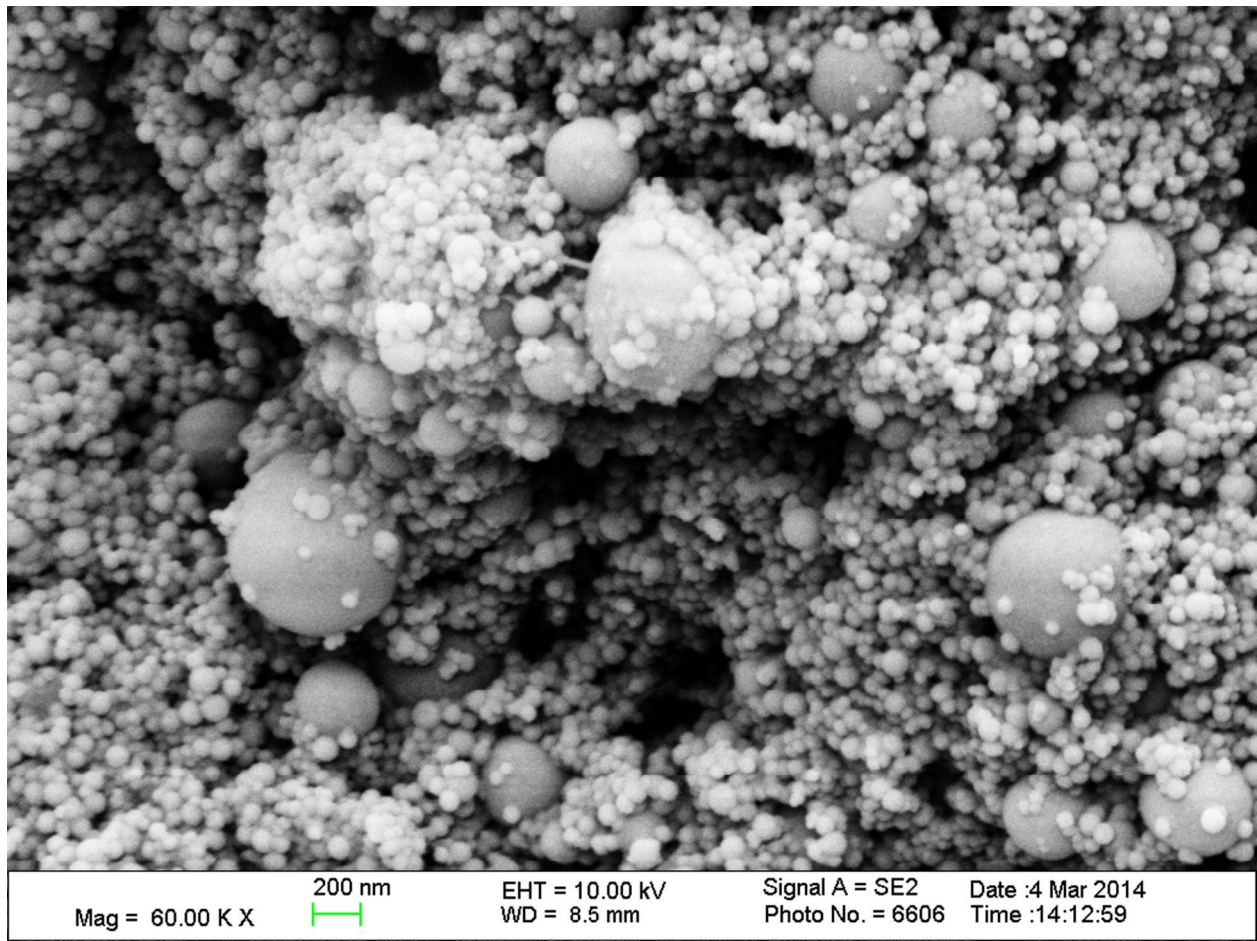

Supporting Figure 3: SEM image of CS-HAP (15%-60% w/v) colloidal gel (scale bar = 200 nm)



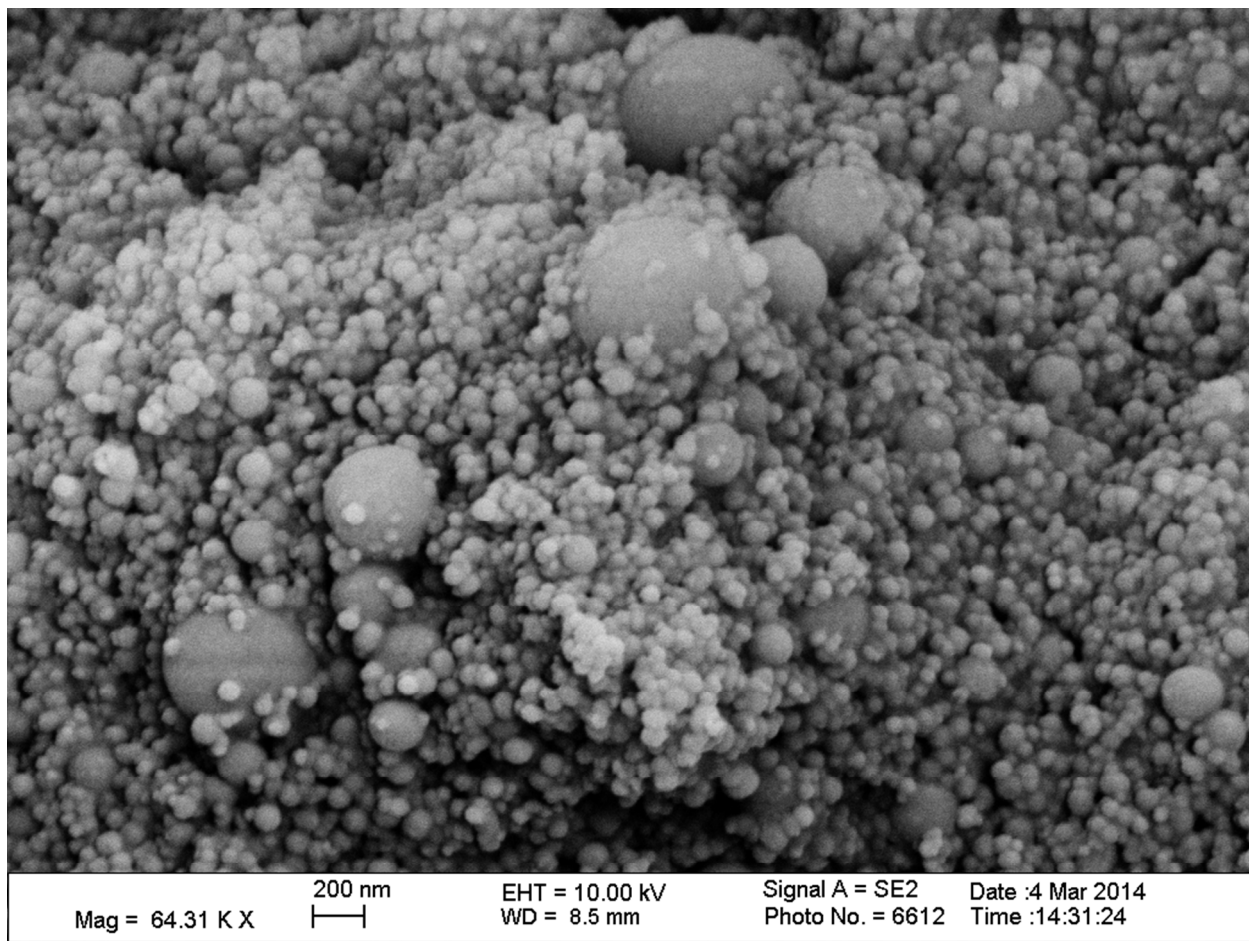

Supporting Figure 4: SEM image of HA-HAP (15%-60% w/v) colloidal gel (scale bar = 200 nm)

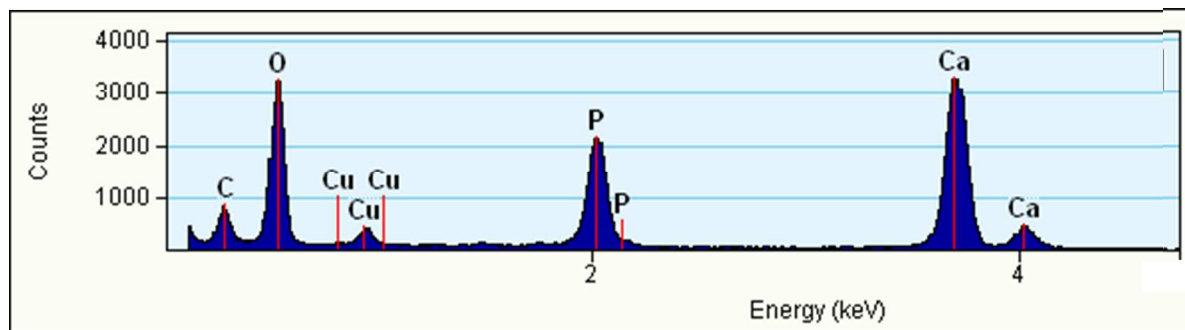

Supporting Figure 5: EDS spectra of HAP particles

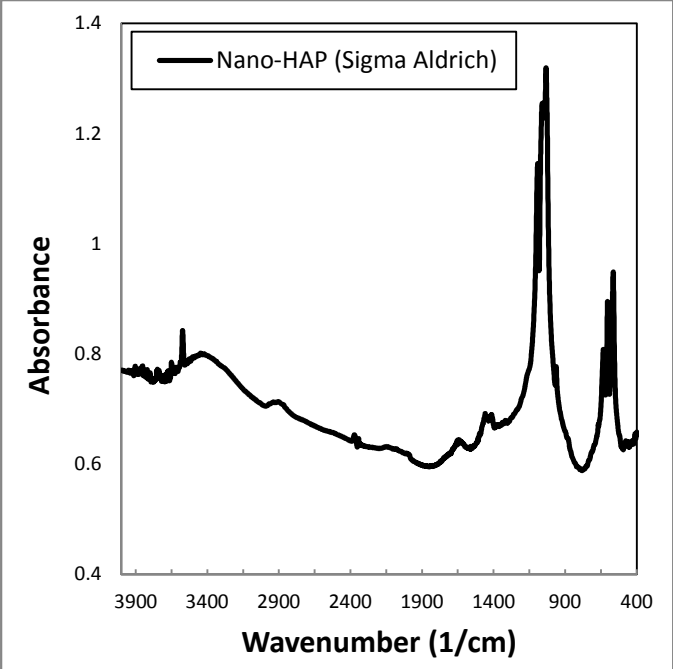

Supporting Figure 6: FTIR spectra of HAP particles. <sup>15, 16</sup>

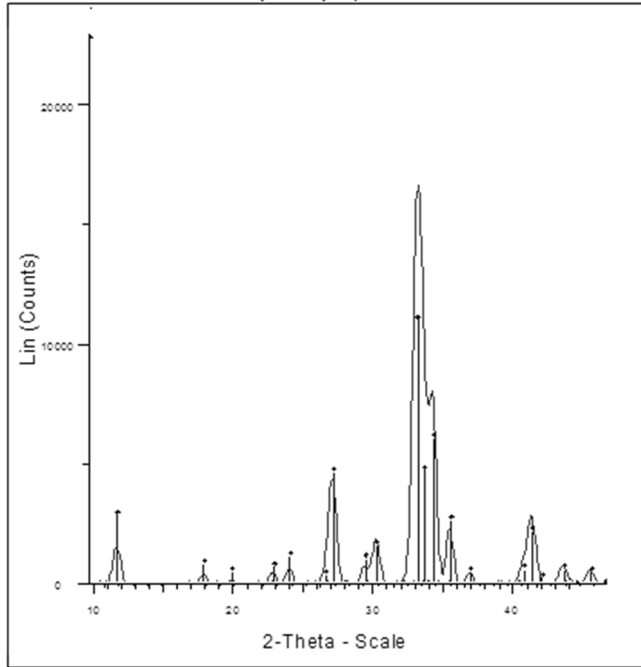

Supporting Figure 7: XRD of HAP particles (curve) compared to ICDD (vertical lines) HAP standard. <sup>15, 16</sup>

Supporting Table 1: CS-HAP rheological properties estimated by H-B fluid model

| [CS]<br>(% w/v) | [HAP]   |                | $\tau_y$ (Yield Stress) (Pa) |   |         | K (Consistency Index) (Pa·s <sup>n</sup> ) |   |        | n (Flow Behavior Index) |   |        | RMSE   |
|-----------------|---------|----------------|------------------------------|---|---------|--------------------------------------------|---|--------|-------------------------|---|--------|--------|
|                 | (% w/v) | $\phi$ (% v/v) | Average                      | ± | 95% CI  | Average                                    | ± | 95% CI | Average                 | ± | 95% CI |        |
| CS 10%          | 0%      | 0.0%           | 0.01                         | ± | 0.07    | 0.04                                       | ± | 0.01   | 0.93                    | ± | 0.02   | 0.06   |
|                 | 5%      | 3.1%           | 0.05                         | ± | 0.10    | 0.14                                       | ± | 0.01   | 0.86                    | ± | 0.01   | 0.10   |
|                 | 10%     | 6.1%           | 0.52                         | ± | 0.55    | 0.11                                       | ± | 0.03   | 0.93                    | ± | 0.04   | 0.57   |
|                 | 20%     | 12.3%          | 0.96                         | ± | 0.61    | 0.24                                       | ± | 0.05   | 0.85                    | ± | 0.03   | 0.61   |
|                 | 40%     | 24.6%          | 10.46                        | ± | 2.39    | 0.87                                       | ± | 0.28   | 0.77                    | ± | 0.05   | 2.20   |
|                 | 80%     | 49.2%          | 1403.00                      | ± | 1193.00 | 38.34                                      | ± | 52.66  | 0.28                    | ± | 2.84   | 286.60 |
| CS 15%          | 0%      | 0.0%           | -0.23                        | ± | 0.24    | 0.34                                       | ± | 0.03   | 0.81                    | ± | 0.02   | 0.20   |
|                 | 7.5%    | 4.6%           | 0.24                         | ± | 0.54    | 0.30                                       | ± | 0.04   | 0.86                    | ± | 0.02   | 0.53   |
|                 | 15%     | 9.2%           | 0.31                         | ± | 0.61    | 0.51                                       | ± | 0.06   | 0.81                    | ± | 0.02   | 0.59   |
|                 | 30%     | 18.4%          | 2.33                         | ± | 0.72    | 1.52                                       | ± | 0.10   | 0.73                    | ± | 0.01   | 0.63   |
|                 | 60%     | 36.9%          | 218.50                       | ± | 21.10   | 2.69                                       | ± | 1.23   | 0.80                    | ± | 0.06   | 3.51   |
|                 | —       | —              | —                            | ± | —       | —                                          | ± | —      | —                       | ± | —      | —      |
| CS 20%          | 0%      | 0.0%           | 0.13                         | ± | 0.16    | 0.43                                       | ± | 0.02   | 0.85                    | ± | 0.01   | 0.14   |
|                 | 10%     | 6.1%           | -0.65                        | ± | 0.65    | 1.08                                       | ± | 0.07   | 0.78                    | ± | 0.01   | 0.60   |
|                 | 20%     | 12.3%          | -0.72                        | ± | 0.84    | 2.23                                       | ± | 0.13   | 0.71                    | ± | 0.01   | 0.73   |
|                 | 40%     | 24.6%          | 11.66                        | ± | 3.67    | 4.06                                       | ± | 0.55   | 0.72                    | ± | 0.02   | 3.22   |
|                 | 80%     | 49.2%          | 1350.00                      | ± | 68.00   | 3.14                                       | ± | 2.49   | 0.93                    | ± | 0.11   | 31.10  |
|                 | —       | —              | —                            | ± | —       | —                                          | ± | —      | —                       | ± | —      | —      |
| CS 30%          | 0%      | 0.0%           | 0.15                         | ± | 1.48    | 1.34                                       | ± | 0.13   | 0.83                    | ± | 0.01   | 1.44   |
|                 | 15%     | 9.2%           | -2.23                        | ± | 1.27    | 4.02                                       | ± | 0.19   | 0.73                    | ± | 0.01   | 1.11   |
|                 | 30%     | 18.4%          | -2.06                        | ± | 3.67    | 7.97                                       | ± | 0.56   | 0.72                    | ± | 0.01   | 3.18   |
|                 | 60%     | 36.9%          | 134.70                       | ± | 25.70   | 20.20                                      | ± | 3.77   | 0.73                    | ± | 0.03   | 22.56  |
|                 | —       | —              | —                            | ± | —       | —                                          | ± | —      | —                       | ± | —      | —      |
|                 | —       | —              | —                            | ± | —       | —                                          | ± | —      | —                       | ± | —      | —      |
| CS 40%          | 0%      | 0.0%           | -1.86                        | ± | 1.26    | 3.19                                       | ± | 0.13   | 0.80                    | ± | 0.01   | 1.19   |
|                 | 20%     | 12.3%          | -11.56                       | ± | 8.84    | 10.39                                      | ± | 1.37   | 0.71                    | ± | 0.02   | 7.65   |
|                 | 40%     | 24.6%          | 3.09                         | ± | 13.97   | 16.55                                      | ± | 1.69   | 0.77                    | ± | 0.02   | 12.82  |
|                 | 80%     | 49.2%          | 958.80                       | ± | 368.20  | 382.40                                     | ± | 205.90 | 0.52                    | ± | 0.10   | 125.80 |
|                 | —       | —              | —                            | ± | —       | —                                          | ± | —      | —                       | ± | —      | —      |
|                 | —       | —              | —                            | ± | —       | —                                          | ± | —      | —                       | ± | —      | —      |
| CS 60%          | 0%      | 0.0%           | -7.96                        | ± | 3.28    | 10.47                                      | ± | 0.36   | 0.78                    | ± | 0.01   | 3.06   |
|                 | 30%     | 18.4%          | -65.26                       | ± | 83.57   | 44.58                                      | ± | 12.56  | 0.72                    | ± | 0.04   | 72.90  |
|                 | 60%     | 36.9%          | 112.60                       | ± | 47.50   | 199.30                                     | ± | 17.20  | 0.68                    | ± | 0.02   | 24.16  |
|                 | —       | —              | —                            | ± | —       | —                                          | ± | —      | —                       | ± | —      | —      |
|                 | —       | —              | —                            | ± | —       | —                                          | ± | —      | —                       | ± | —      | —      |
|                 | —       | —              | —                            | ± | —       | —                                          | ± | —      | —                       | ± | —      | —      |
| CS 80%          | 0%      | 0.0%           | -81.25                       | ± | 101.09  | 48.17                                      | ± | 18.46  | 0.74                    | ± | 0.06   | 79.21  |
|                 | 40%     | 24.6%          | 11.33                        | ± | 55.17   | 111.00                                     | ± | 14.80  | 0.78                    | ± | 0.03   | 33.02  |
|                 | —       | —              | —                            | ± | —       | —                                          | ± | —      | —                       | ± | —      | —      |
|                 | —       | —              | —                            | ± | —       | —                                          | ± | —      | —                       | ± | —      | —      |
|                 | —       | —              | —                            | ± | —       | —                                          | ± | —      | —                       | ± | —      | —      |
|                 | —       | —              | —                            | ± | —       | —                                          | ± | —      | —                       | ± | —      | —      |

Individual points are reported (average ± 95% CI) from triplicate studies and overall model fit reported as root-mean-squared error (RMSE).

Supporting Table 2: HA-HAP rheological properties estimated by H-B fluid model

| [HA]<br>(% w/v) | [HAP]   |                | $\tau_y$ (Yield Stress) (Pa) |   |        | K (Consistency Index) (Pa·s <sup>n</sup> ) |   |        | n (Flow Behavior Index) |   |        | RMSE   |
|-----------------|---------|----------------|------------------------------|---|--------|--------------------------------------------|---|--------|-------------------------|---|--------|--------|
|                 | (% w/v) | $\phi$ (% v/v) | Average                      | ± | 95% CI | Average                                    | ± | 95% CI | Average                 | ± | 95% CI |        |
| HA 10%          | 0%      | 0.0%           | 0.26                         | ± | 0.21   | 0.11                                       | ± | 0.01   | 0.98                    | ± | 0.02   | 0.21   |
|                 | 5%      | 3.1%           | 0.39                         | ± | 0.35   | 0.10                                       | ± | 0.01   | 0.99                    | ± | 0.03   | 0.38   |
|                 | 10%     | 6.1%           | 0.52                         | ± | 0.50   | 0.06                                       | ± | 0.01   | 1.05                    | ± | 0.04   | 0.56   |
|                 | 20%     | 12.3%          | 0.37                         | ± | 1.68   | 0.55                                       | ± | 0.15   | 0.83                    | ± | 0.04   | 1.64   |
|                 | 40%     | 24.6%          | 7.24                         | ± | 2.94   | 0.85                                       | ± | 0.22   | 0.86                    | ± | 0.04   | 2.94   |
|                 | 80%     | 49.2%          | 912.40                       | ± | 266.60 | 105.90                                     | ± | 133.20 | 0.37                    | ± | 0.16   | 53.06  |
| HA 15%          | 0%      | 0.0%           | 1.04                         | ± | 1.41   | 0.17                                       | ± | 0.04   | 1.01                    | ± | 0.09   | 1.59   |
|                 | 7.5%    | 4.6%           | 1.41                         | ± | 1.31   | 0.34                                       | ± | 0.05   | 1.01                    | ± | 0.02   | 1.43   |
|                 | 15%     | 9.2%           | 2.97                         | ± | 1.93   | 0.63                                       | ± | 0.09   | 0.97                    | ± | 0.02   | 2.07   |
|                 | 30%     | 18.4%          | 7.41                         | ± | 0.09   | 2.32                                       | ± | 0.09   | 0.87                    | ± | 0.01   | 1.18   |
|                 | 60%     | 36.9%          | 132.60                       | ± | 17.80  | 46.66                                      | ± | 4.10   | 0.63                    | ± | 0.01   | 13.50  |
|                 | —       | —              | —                            | ± | —      | —                                          | ± | —      | —                       | ± | —      | —      |
| HA 20%          | 0%      | 0.0%           | 1.10                         | ± | 1.44   | 0.49                                       | ± | 0.05   | 1.03                    | ± | 0.01   | 1.59   |
|                 | 10%     | 6.1%           | 0.46                         | ± | 0.36   | 1.15                                       | ± | 0.02   | 0.96                    | ± | 0.00   | 0.38   |
|                 | 20%     | 12.3%          | -0.24                        | ± | 2.32   | 3.07                                       | ± | 0.15   | 0.89                    | ± | 0.01   | 2.37   |
|                 | 40%     | 24.6%          | -4.49                        | ± | 23.44  | 14.81                                      | ± | 2.76   | 0.77                    | ± | 0.03   | 21.64  |
|                 | 80%     | 49.2%          | 263.00                       | ± | 521.90 | 759.90                                     | ± | 373.10 | 0.39                    | ± | 0.08   | 113.10 |
|                 | —       | —              | —                            | ± | —      | —                                          | ± | —      | —                       | ± | —      | —      |
| HA 30%          | 0%      | 0.0%           | -5.02                        | ± | 6.54   | 3.40                                       | ± | 0.32   | 0.95                    | ± | 0.01   | 6.93   |
|                 | 15%     | 9.2%           | -32.50                       | ± | 44.75  | 12.94                                      | ± | 4.32   | 0.81                    | ± | 0.05   | 43.00  |
|                 | 30%     | 18.4%          | -17.48                       | ± | 28.59  | 22.31                                      | ± | 3.69   | 0.82                    | ± | 0.03   | 24.54  |
|                 | 60%     | 36.9%          | -22.98                       | ± | 111.90 | 234.10                                     | ± | 44.40  | 0.65                    | ± | 0.04   | 53.53  |
|                 | —       | —              | —                            | ± | —      | —                                          | ± | —      | —                       | ± | —      | —      |
|                 | —       | —              | —                            | ± | —      | —                                          | ± | —      | —                       | ± | —      | —      |
| HA 40%          | 0%      | 0.0%           | -37.25                       | ± | 49.85  | 15.06                                      | ± | 5.34   | 0.86                    | ± | 0.06   | 44.50  |
|                 | 20%     | 12.3%          | -33.06                       | ± | 43.35  | 30.27                                      | ± | 6.78   | 0.85                    | ± | 0.04   | 33.44  |
|                 | 40%     | 24.6%          | -221.30                      | ± | 376.60 | 223.10                                     | ± | 151.80 | 0.65                    | ± | 0.13   | 178.20 |
|                 | —       | —              | —                            | ± | —      | —                                          | ± | —      | —                       | ± | —      | —      |
|                 | —       | —              | —                            | ± | —      | —                                          | ± | —      | —                       | ± | —      | —      |
|                 | —       | —              | —                            | ± | —      | —                                          | ± | —      | —                       | ± | —      | —      |

Individual points are reported (Average ± 95% CI) from triplicate studies and overall model fit reported as root-mean-squared error (RMSE).

Supporting Table 3: Pure HAP rheological properties estimated by H-B fluid model

| [HAP]       |                | $\tau_y$ (Yield Stress) (Pa) |   |         | K (Consistency Index) (Pa-s <sup>n</sup> ) |   |        | n (Flow Behavior Index) |   |        | RMSE   |
|-------------|----------------|------------------------------|---|---------|--------------------------------------------|---|--------|-------------------------|---|--------|--------|
| (% w/v)     | $\phi$ (% v/v) | Average                      | ± | 95% CI  | Average                                    | ± | 95% CI | Average                 | ± | 95% CI | —      |
| <b>0%</b>   | <b>0.0%</b>    | 0.00                         | ± | 0.00    | 0.001                                      | ± | 0.00   | 0.95                    | ± | 0.18   | 0.01   |
| <b>5%</b>   | <b>3.1%</b>    | -0.04                        | ± | 0.13    | 0.002                                      | ± | 0.05   | 1.05                    | ± | 0.24   | 0.07   |
| <b>7.5%</b> | <b>4.6%</b>    | 0.00                         | ± | 0.10    | 0.001                                      | ± | 0.05   | 1.07                    | ± | 0.20   | 0.02   |
| <b>10%</b>  | <b>6.1%</b>    | 0.00                         | ± | 0.20    | 0.002                                      | ± | 0.05   | 1.05                    | ± | 0.25   | 0.21   |
| <b>15%</b>  | <b>9.2%</b>    | -0.06                        | ± | 0.18    | 0.01                                       | ± | 0.02   | 0.90                    | ± | 0.19   | 0.16   |
| <b>20%</b>  | <b>12.3%</b>   | -0.15                        | ± | 0.28    | 0.03                                       | ± | 0.05   | 0.81                    | ± | 0.17   | 0.24   |
| <b>30%</b>  | <b>18.4%</b>   | -9.57                        | ± | 18.69   | 0.97                                       | ± | 18.05  | 0.91                    | ± | 0.15   | 0.92   |
| <b>40%</b>  | <b>24.6%</b>   | -11.07                       | ± | 23.76   | 2.78                                       | ± | 21.94  | 0.90                    | ± | 0.18   | 1.89   |
| <b>60%</b>  | <b>36.9%</b>   | 12.68                        | ± | 122.42  | 35.29                                      | ± | 86.47  | 0.85                    | ± | 0.43   | 29.42  |
| <b>80%</b>  | <b>49.2%</b>   | 1124.87                      | ± | 1245.02 | 21.98                                      | ± | 53.86  | 0.56                    | ± | 0.83   | 384.31 |

Individual points are reported (Average  $\pm$  95% CI) from triplicate studies and overall model fit reported as root-mean-squared error (RMSE).

Supporting Table 4: Viscoelastic recovery of GAG (15%) – HAP (60%) mixtures compared to pure components

|          | [GAG] | [HAP] | Phase I: Initial |           |              | Phase II: Disruption |           |              | Phase III: Recovery |           |              | G' Recovery<br>(5 min) (%) |
|----------|-------|-------|------------------|-----------|--------------|----------------------|-----------|--------------|---------------------|-----------|--------------|----------------------------|
|          |       |       | G' (kPa)         | G'' (kPa) | $\delta$ (°) | G' (kPa)             | G'' (kPa) | $\delta$ (°) | G' (kPa)            | G'' (kPa) | $\delta$ (°) |                            |
| Pure CS  | 15%   | —     | 8.00E-05         | 1.88E-03  | 88           | 2.40E-04             | 1.57E-03  | 81           | 8.00E-05            | 1.90E-03  | 88           | 100%                       |
| Mixture  | 15%   | 60%   | 7.8              | 1.9       | 14           | 9.75E-04             | 2.34E-02  | 88           | 4.95                | 1.42      | 16           | 64%                        |
| Pure HAP | —     | 60%   | 878              | 86.7      | 6            | 1.10E-03             | 1.12E-02  | 84           | 810                 | 82.8      | 6            | 92%                        |
| Pure HA  | 15%   | —     | 1.40E-04         | 1.70E-03  | 85           | 2.30E-04             | 1.79E-03  | 83           | 1.40E-04            | 1.73E-03  | 85           | 100%                       |
| Mixture  | 15%   | 60%   | 175              | 20.2      | 7            | 1.58E-03             | 1.39E-01  | 89           | 149                 | 16.8      | 6            | 85%                        |
| Pure HAP | —     | 60%   | 878              | 86.7      | 6            | 1.10E-03             | 1.12E-02  | 84           | 810                 | 82.8      | 6            | 92%                        |
